# Supplementary material for: Polyethylene Films Containing Plant Extracts in the Polymer Matrix as Antibacterial and Antiviral Materials
Source: MDPI journal article supplement (doi:10.3390/ijms222413438), 2021-12-14
Supplement: s1 [file s1]

## Supplementary Materials

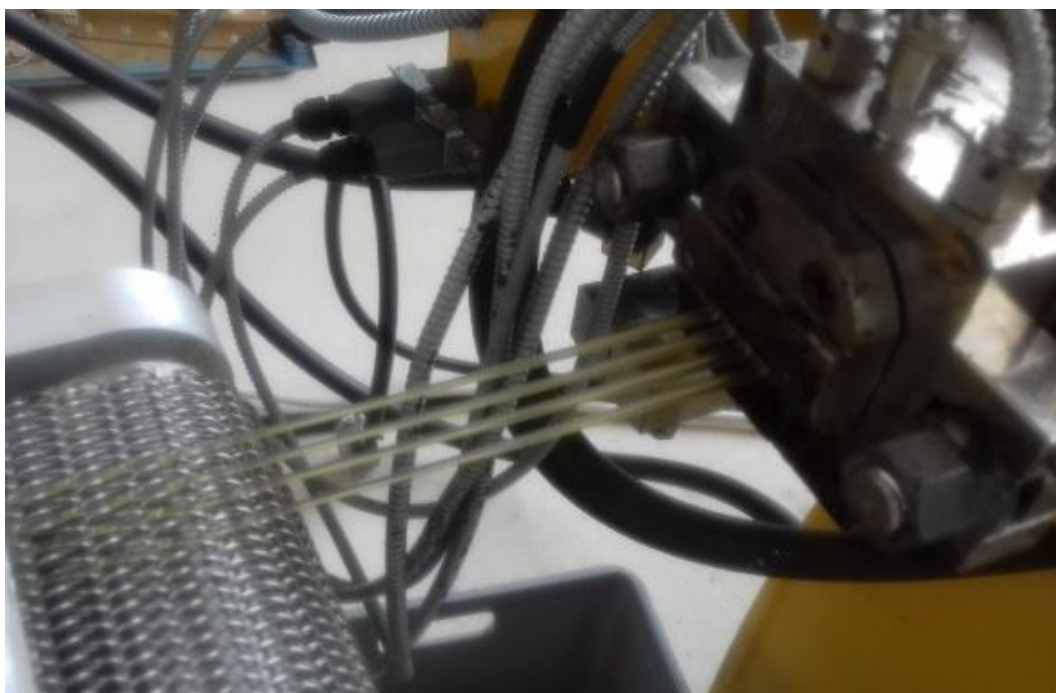

**Figure S12 left:** Regranulation of PE with the extracted mixture.

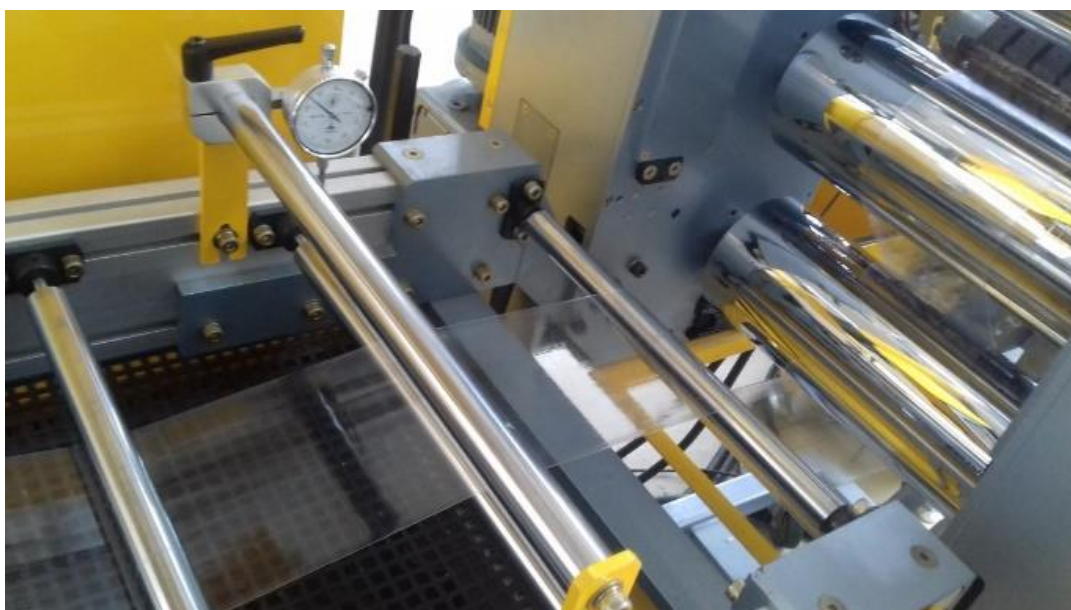

**Right 12 right:** Extrusion of the aPE.
